# Supplementary material for: Three-dimensional hollow reduced graphene oxide spheres with a hierarchically porous structure for high-performance lithium–sulfur batteries
Source: Royal Society of Chemistry journal article supplement (doi:10.1039/c9qi00656g), 2019-01-01
Supplement: c9qi00656g1.pdf [file c9qi00656g1.pdf]

Supplementary Information

Three-dimensional hollow reduced graphene oxide spheres with hierarchically porous structure for high performance lithium-sulfur batteries

Mengxia Li, Ying Dai \*, Xinmei Pei, Wen Chen

School of Materials Science and Engineering, Wuhan University of Technology,  
Wuhan, 430070, China

\* Corresponding author.

*E-mail address:* [yingdai@whut.edu.cn](mailto:yingdai@whut.edu.cn) (Y. Dai).

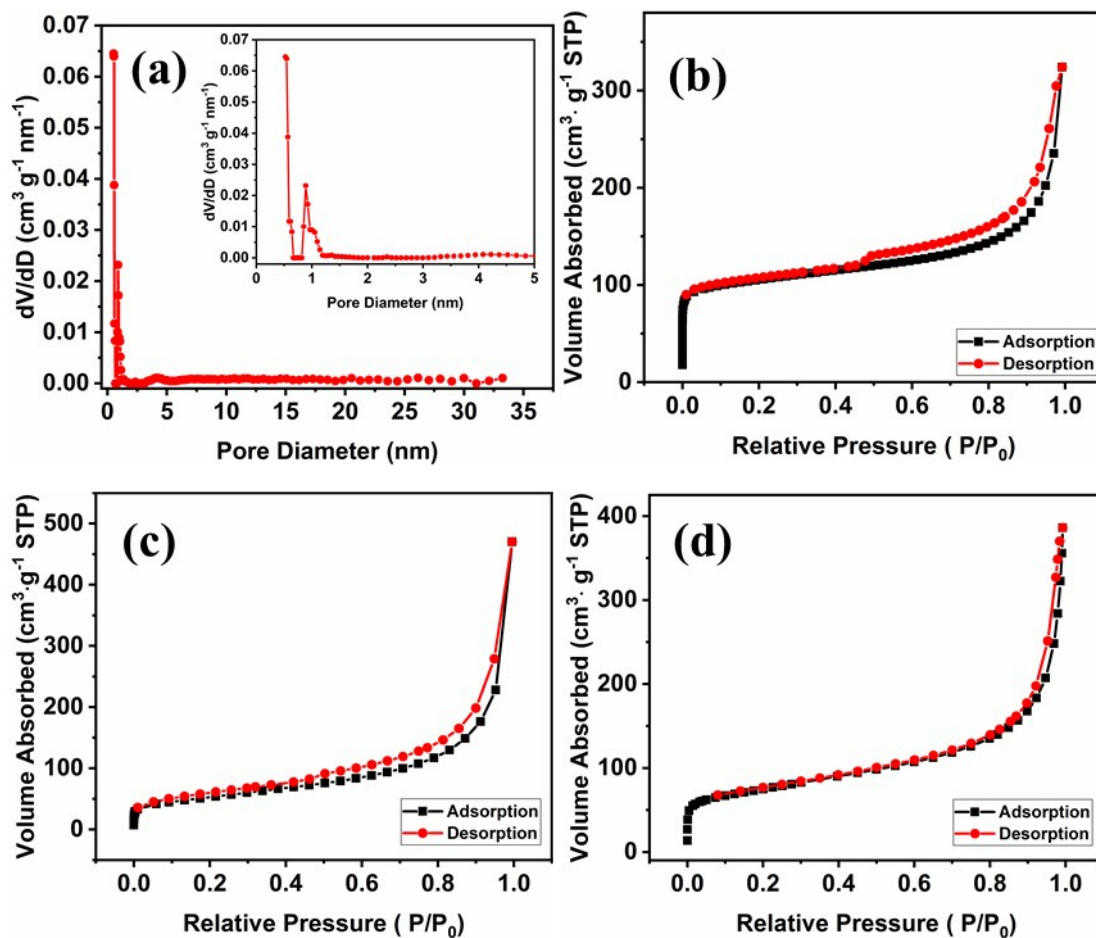

**Fig.S1.** (a) Pore size distribution curve of rGO, Nitrogen adsorption/desorption isotherms of (b) rGO, (c) HrGO spheres without the addition of PVP, and (d) HrGO spheres with the addition of PVP.

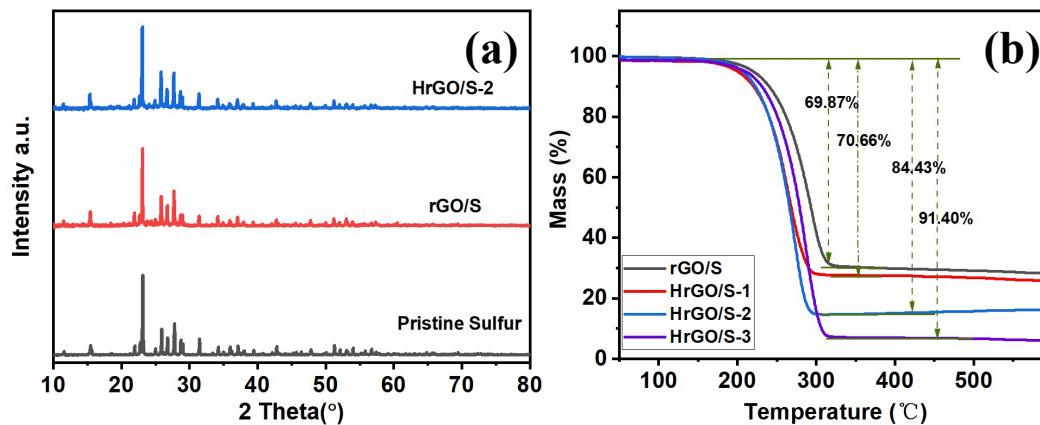

**Fig. S2.** (a) XRD patterns of pristine sulfur, rGO/S and HrGO/S-2 composites. (b) TG curves of rGO/S, HrGO/S-1, HrGO/S-2, and HrGO/S-3 composites.

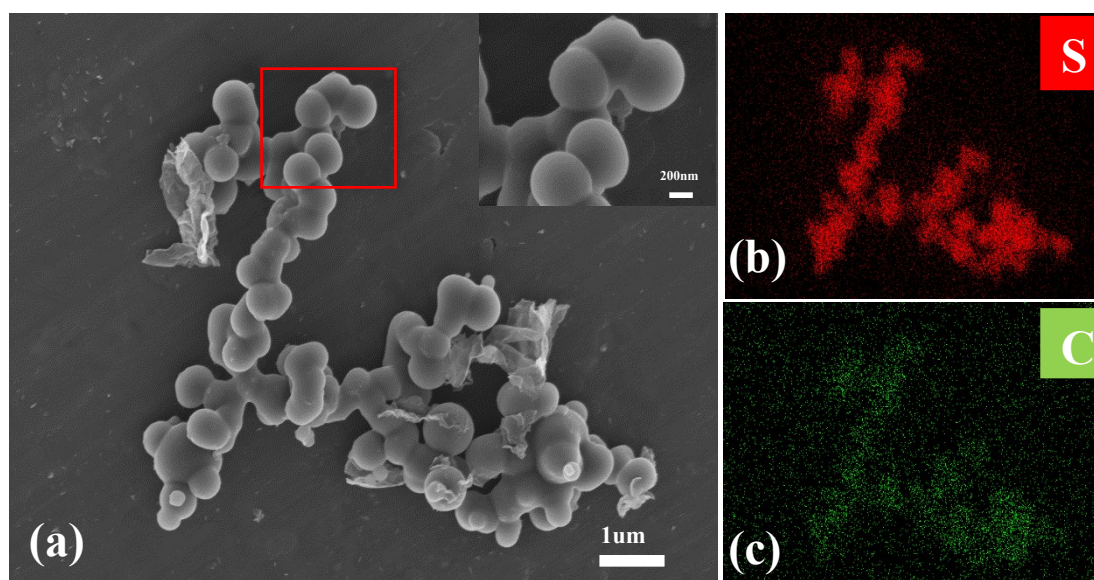

**Fig.S3.** (a) SEM images of HrGO/S-2 (inset is magnified image of the selected region), EDS elemental mapping of (b) S and (c) C of the region in image (a).

|                           | Re ( $\Omega$ ) | Rst ( $\Omega$ ) | Rct ( $\Omega$ ) |
|---------------------------|-----------------|------------------|------------------|
| rGO/S After 1 cycle       | 8.519           | 78.57            | 108.7            |
| HrGO/S-2 After 1 cycle    | 7.465           | 70.79            | 42.91            |
| HrGO/S-2 After 100 cycles | 7.243           | 26.58            | 26.65            |

**Table.S1** Summary of the relevant parameters determined from the fitting of the EIS curves

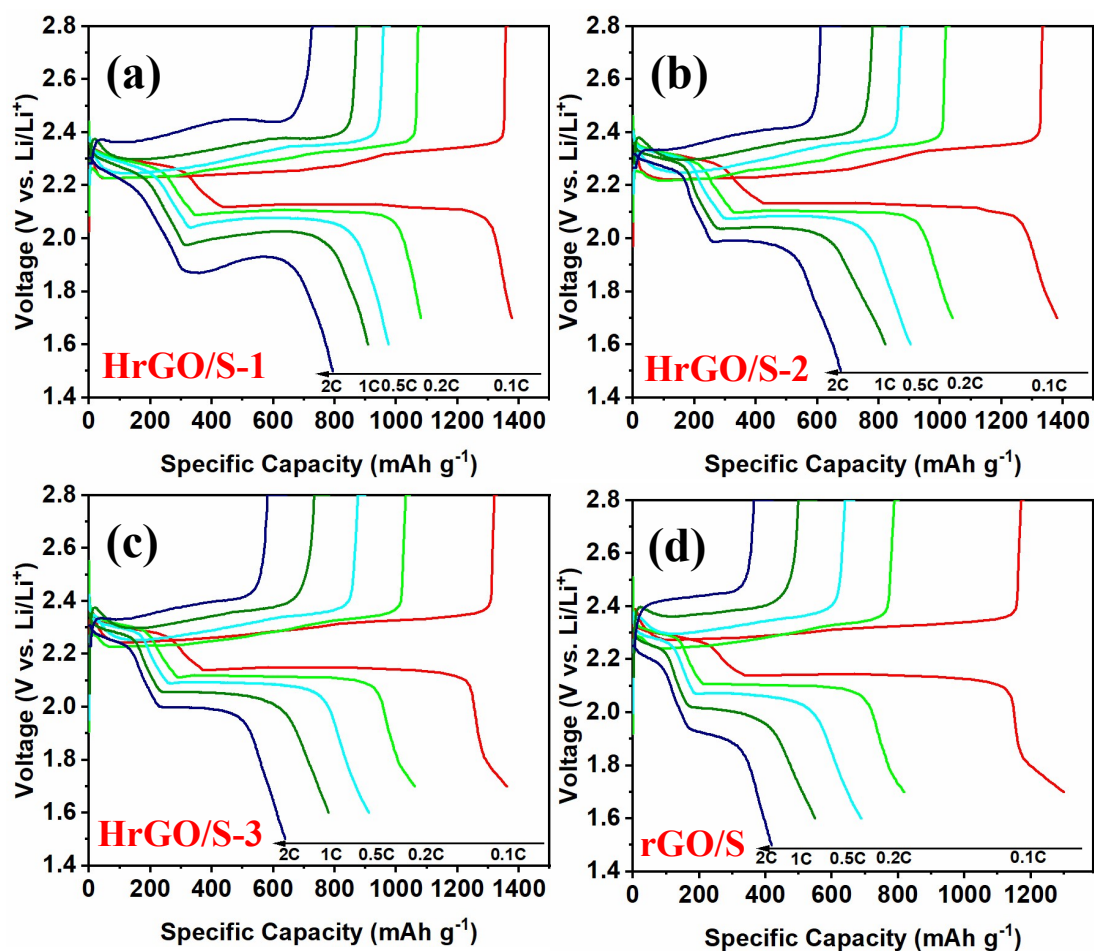

Fig. S4. (a) Discharge/charge voltage profiles of (a) HrGO/S-1, (b) HrGO/S-2, (c) HrGO/S-3 and (d) rGO/S at different C-rates, ranging from 0.1 C to 2 C.

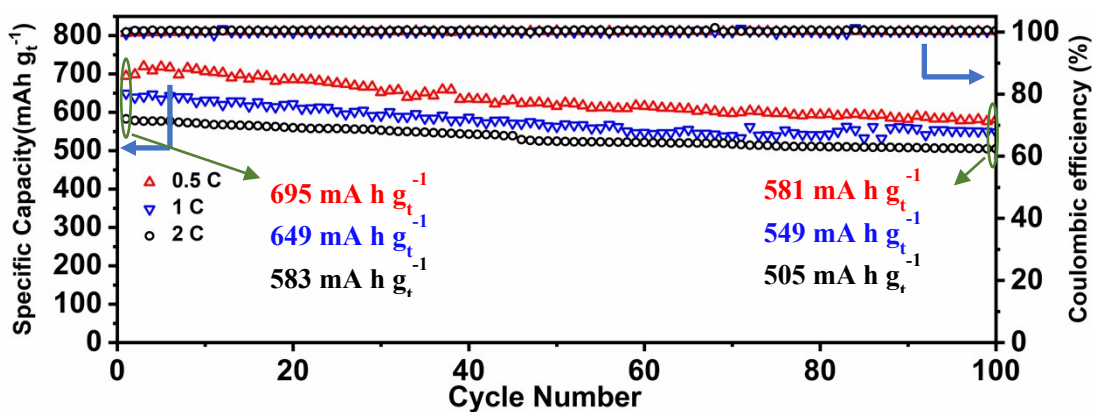

Fig.S5. Cycling performance and coulombic efficiency of HrGO/S-2 based on the total mass of the cathode materials at the current rate of 0.5 C, 1 C, and 2 C over 100 cycles. (The total mass of the cathode materials includes the mass of HrGO/S composites, super P, and PVDF.)

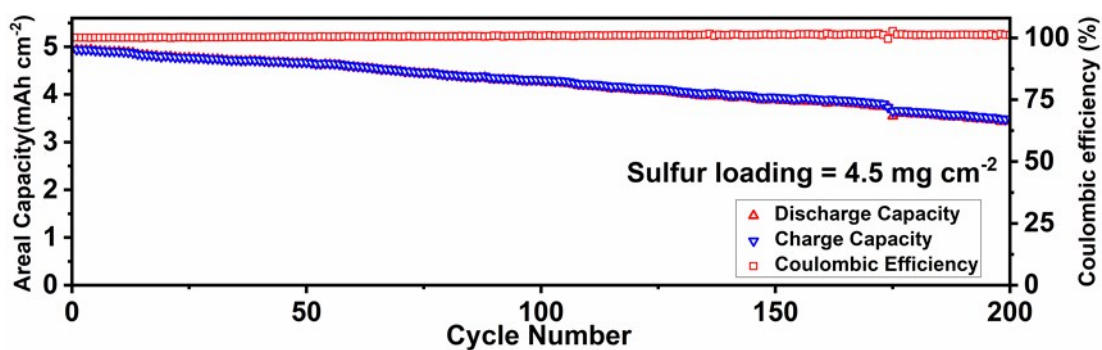

**Fig.S6.** Areal capacity and coulombic efficiency of HrGO/S-2 with the sulfur loading of  $4.5 \text{ mg cm}^{-2}$  at the current density of  $1.5 \text{ mA cm}^{-2}$  over 200 cycles.

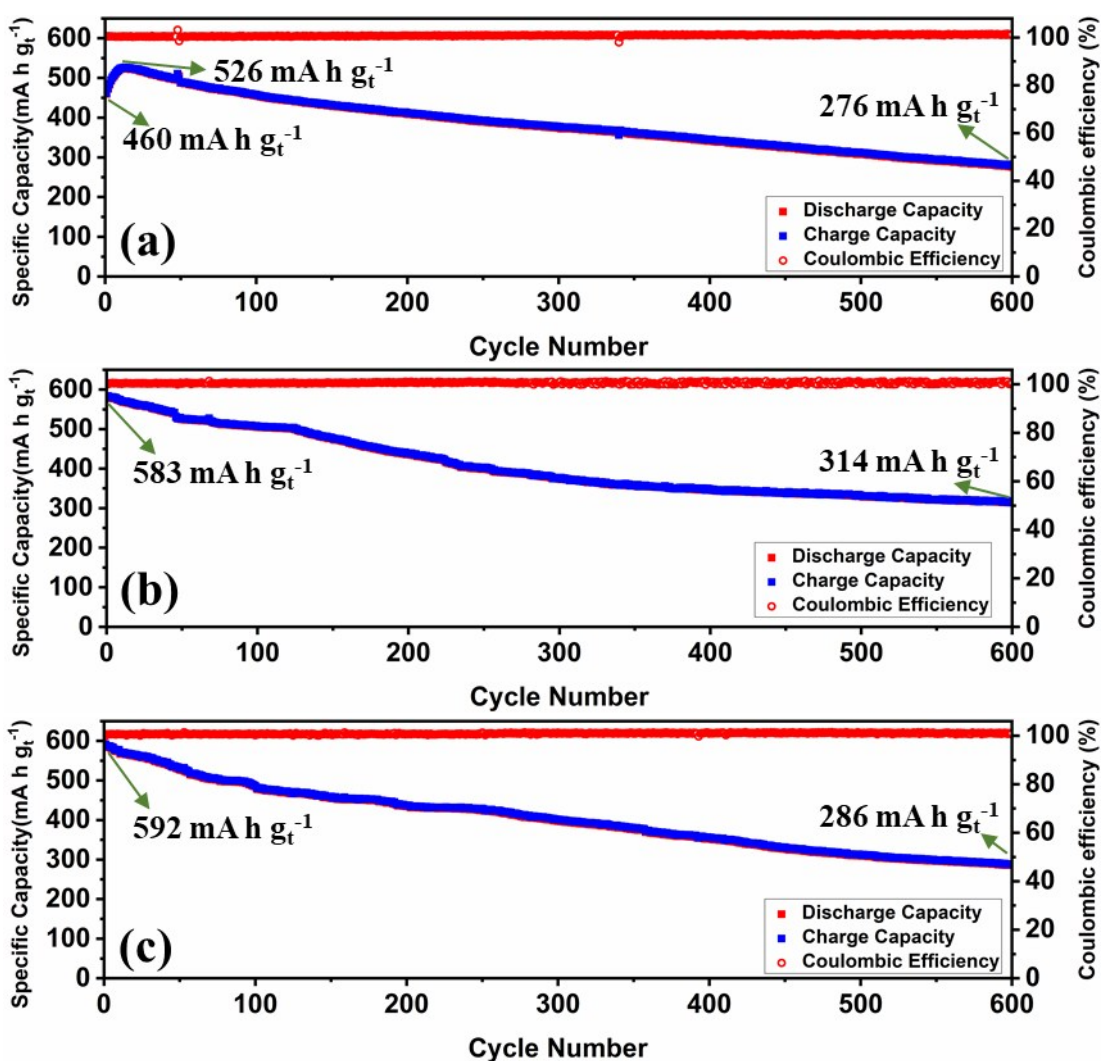

**Fig.S7.** Cycling performance and coulombic efficiency of (a) HrGO/S-1, (b) HrGO/S-2, and (c) HrGO/S-3 based on the total mass of the cathode materials at the current rate of  $2 \text{ C}$  over 600 cycles.
